# Supplementary material for: Genetic variants of MARCO are associated with susceptibility to pulmonary tuberculosis in a Gambian population
Source: PubMed Central journal article supplement (PMC3652798; doi:10.1186/1471-2350-14-47), 2013-04-23
Supplement: 1471-2350-14-47-S1.pdf [file 1471-2350-14-47-S1.pdf]

Supplemental Table 1. Genotyped SNPs in *MSRI*.

| <b>SNP</b> | <b>CHR</b> | <b>POSITION</b> |
|------------|------------|-----------------|
| rs13262326 | 8          | 15958060        |
| rs12678046 | 8          | 15970070        |
| rs1904577  | 8          | 15971684        |
| rs17620619 | 8          | 15981722        |
| rs17677251 | 8          | 15985518        |
| rs2170115  | 8          | 15987187        |
| rs12718376 | 8          | 15998145        |
| rs351556   | 8          | 16004010        |
| rs1564819  | 8          | 16005211        |
| rs351554   | 8          | 16007395        |
| rs3747531  | 8          | 16012648        |
| rs13306543 | 8          | 16021585        |
| rs13306549 | 8          | 16026284        |
| rs1531652  | 8          | 16027195        |
| rs11988710 | 8          | 16033108        |
| rs398095   | 8          | 16041765        |
| rs394447   | 8          | 16048146        |
| rs364558   | 8          | 16050479        |
| rs3827509  | 8          | 16051652        |
| rs3810780  | 8          | 16051850        |
| rs3827510  | 8          | 16052087        |
| rs7815674  | 8          | 16059926        |
| rs351581   | 8          | 16053426        |
| rs6530946  | 8          | 16054928        |
